# Supplementary figures and images for: RAA-CRISPR-HCR cascade amplification for ultrasensitive visual detection of African swine fever virus DNA
Source: Royal Society of Chemistry journal article supplement (doi:10.1039/d5cc06815k), 2026-01-01

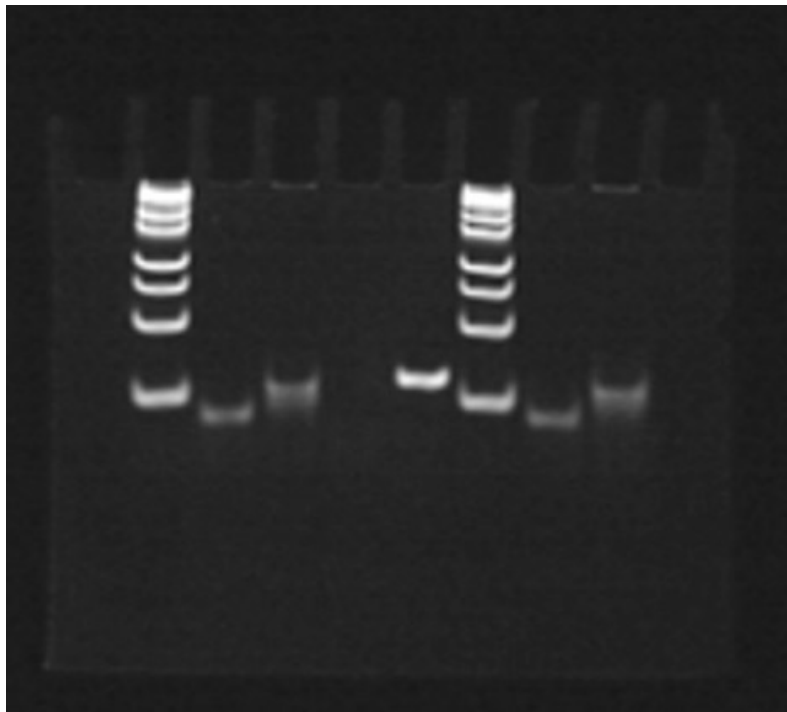

Supplement: d5cc06815k1.pdf [file d5cc06815k1.pdf]
